# Supplementary material for: The eukaryotic bell-shaped temporal rate of DNA replication origin firing emanates from a balance between origin activation and passivation
Source: eLife journal article supplement (doi:10.7554/elife.35192), 2018-06-01

**a**

- Monomer of chromatin
- Potential origin of replication
- Replicated chromatin
- Firing factor

**c**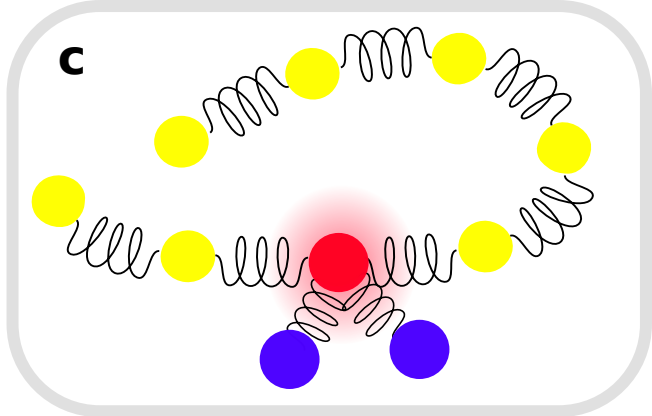**b**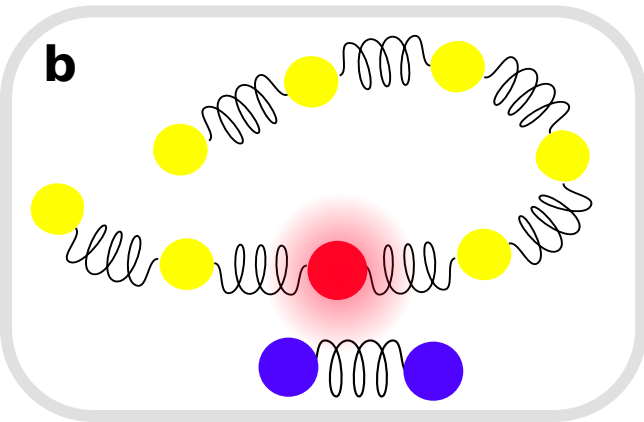**d**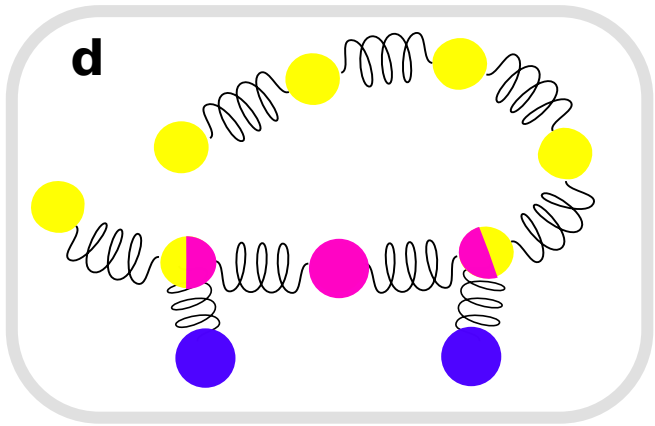

Supplement: supp [file elife-35192-supp-v1.zip]
